# Supplementary material
Source: PubMed Central journal article supplement (PMC3017630)
Supplement: NIHMS255855-supplement-1_si_001.pdf [file NIHMS255855-supplement-1_si_001.pdf]

**Table S1. Detailed information of the 8 lectins used for lectin microarray.**

| Lectin                    | Abbreviation | Carbohydrate specificity                           | Source                   |
|---------------------------|--------------|----------------------------------------------------|--------------------------|
| Concanavalin A            | ConA         | Branched and terminal $\alpha$ -linked Man         | Vector Laboratories Inc. |
| Ulex europaeus lectin I   | UEAI         | $\alpha$ (1-2)-linked Fuc                          | EY Laboratories Inc.     |
| Wheat germ agglutinin     | WGA          | GlcNAc $\beta$                                     | EY Laboratories Inc.     |
| Sambucus nigra lectin     | SNA          | Neu5Ac $\alpha$ (2-6)Gal                           | Vector Laboratories Inc. |
| Peanut agglutinin         | PNA          | Gal $\beta$ (terminal)                             | Vector Laboratories Inc. |
| Lens culinaris agglutinin | LCA          | $\alpha$ -linked mannose, Fuc $\alpha$ (1-6)GlcNAc | Vector Laboratories Inc. |
| Solanum tuberosum lectin  | STL          | GlcNAc $\beta$ (1-4)GlcNAc                         | Vector Laboratories Inc. |
| Trichosanthes kirilowii   | TKA          | Gal $\beta$                                        | EY Laboratories Inc.     |

Man, mannose; Fuc, fucose; Gal, galactose; GlcNAc, *N*-acetyl-D-glucosamine; Neu5Ac, *N*-acetylneuraminic acid.
